# Supplementary material for: SLC16a6, mTORC1, and Autophagy Regulate Ketone Body Excretion in the Intestinal Cells
Source: MDPI journal article supplement (doi:10.3390/biology12121467), 2023-11-26
Supplement: s1 [file s1]

Supplemental Table 1 Ingredients of the reconstructed medium

|                                   | DMEM         | Reconstructed medium |
|-----------------------------------|--------------|----------------------|
| Inorganic salts (mM)              |              |                      |
| CaCl <sub>2</sub>                 | 1.8          | -                    |
| CaHCO <sub>3</sub>                | -            | 1.8                  |
| Fe(NO <sub>3</sub> ) <sub>3</sub> | 0.0002       | -                    |
| FeCl <sub>2</sub>                 | -            | 0.0002               |
| MgSO <sub>4</sub>                 | 0.8139       | -                    |
| MgCl <sub>2</sub>                 | -            | 0.8139               |
| KCl                               | 5.3333       | 5.3333               |
| NaHCO <sub>3</sub>                | 44.0         | -                    |
| NaCl or NMDG-Cl                   | 110.3 (NaCl) | 140                  |
| NaH <sub>2</sub> PO <sub>4</sub>  | 0.9058       | -                    |
| KH <sub>2</sub> PO <sub>4</sub>   | -            | 0.44                 |
| K <sub>2</sub> HPO <sub>4</sub>   | -            | 0.44                 |

Reconstructed buffer contains MEM Vitamin Solution (Thermo Fisher), MEM Non-Essential Amino Acids Solution (Thermo Fisher), MEM Amino Acids Solution (Thermo Fisher), and 10 mM HEPS (2-[4-(2-hydroxyethyl)piperazin-1-yl]ethanesulfonic acid). pH of medium was adjusted 7.4 by KOH. NMDG: N-Methyl-D-glucamine.
