# Supplementary material for: SLC16a6, mTORC1, and Autophagy Regulate Ketone Body Excretion in the Intestinal Cells
Source: MDPI journal article supplement (doi:10.3390/biology12121467), 2023-11-26
Supplement: s1 [file s1]

Supplemental Table 2 Primers

| Primer      | Sequence                               | Description    |
|-------------|----------------------------------------|----------------|
| shSLC16a1-F | <u>CACCGATGGATATCCTCCATAATGTTTCGA</u>  | NM_003051.4    |
|             | <u>AAACATTATGGAGGATATCCAT</u>          | NM_001166496.2 |
| shSLC16a1-R | <u>AAAAATGGATATCCTCCATAATGTTTTCG</u>   |                |
|             | <u>AACATTATGGAGGATATCCATC</u>          |                |
| shSLC16a4-F | <u>CACCGCTGGTTATATGATTATACCCACGAA</u>  | NM_004696      |
|             | <u>TGGGTATAATCATATAACCAG</u>           | tv1 to 6       |
| shSLC16a4-R | <u>AAAACCTGGTTATATGATTATACCCATTCGT</u> |                |
|             | <u>GGGTATAATCATATAACCAGC</u>           |                |
| shSLC16a6-F | <u>CACCGCACTGCTCAGACCCATCTTTACGA</u>   | NM_001174166.2 |
|             | <u>ATAAAGATGGGTCTGAGCAGTG</u>          | NM_004694.5    |
| shSLC16a6-R | <u>AAAACACTGCTCAGACCCATCTTTATTCG</u>   |                |
|             | <u>TAAAGATGGGTCTGAGCAGTGC</u>          |                |
| shBasigin-F | <u>CACCGCAGGATTCTGTTTCCTTAGGTTTCGA</u> | NM_001728.4    |
|             | <u>AAACCTAAGGAACAGAATCCTG</u>          | tv1 to 5       |
| shBasigin-R | <u>AAAACAGGATTCTGTTTCCTTAGGTTTTCG</u>  |                |
|             | <u>AACCTAAGGAACAGAATCCTGC</u>          |                |
| shBeclin1-F | <u>CACCGCAGCAGTTCAAAGAAGAGGTTTCG</u>   | NM_003766.5    |
|             | <u>AAAACCTCTTCTTTGAACTGCTG</u>         | NM_001313998.2 |
| shBeclin1-R | <u>AAAACAGCAGTTCAAAGAAGAGGTTTTC</u>    |                |
|             | <u>GAACCTCTTCTTTGAACTGCTGC</u>         |                |
| SLC5a8-F    | AGCCCTGTGTATTGGAATGG                   | NM_145913.5    |
| SLC5a8-R    | CAGACCAACAAGTGCTCCAA                   |                |
| Embigin-F   | TGTGGTGCTGAGCTATTTGG                   | NM_198449.3    |
| Embigin-R   | TTTCCCCTCATCTGAGTGCT                   |                |
| β-actin-F   | TGTTACCAACTGGGACGACA                   | NM_007393.5    |
| β-actin-R   | GGGGTGTTGAAGGTCTCAAA                   |                |
| Basigin-F   | AGCACCAGAATGACAAAGGC                   | NM_001728.4    |
| Basigin-R   | AATCTACGGGGTGGGTTTTC                   | tv1 to 5       |
| Beclin1-F   | ACAGTGACAGTTTGGCACA                    | NM_003766.5    |
| Beclin1-R   | TCCGTAAGGAACAAGTCGGT                   | tv1 to 4       |
| SLC16a1-F   | GTCATGATTGTTGGTGGCTG                   | NM_003051.4    |
| SLC16a1-R   | CAATCATGGTCAGAGCTGGA                   | NM_001166496.2 |
| SLC16a4-F   | GGGTTGCTGATCAAACTGG                    | NM_004696      |
| SLC16a4-R   | GCAAAGAACTGGCAAGTCC                    | tv1 to 6       |
| SLC16a6-F   | ACACTGGGATTCTTTGCACC                   | NM_001174166   |
| SLC16a6-R   | TCCCTGTTGAGGACAAAACC                   | NM_004694.5    |
| hHMGCS2-F   | TATAAGGGGCTGGAGGCTTT                   | NM_005518.4    |
| hHMGCS2-R   | GCATCCTGGGATACTCGAAA                   | NM_001166107.1 |
| mHMGCS2-F   | CCCCTGAGGAATTCACAGAA                   | NM_008256.4    |
| mHMGCS2-R   | GCATCTCATCCACTCGTTCA                   |                |

|       |                      |             |
|-------|----------------------|-------------|
| 18S-F | AAACGGCTACCACATCCAAG | NR_003278.3 |
| 18S-R | GGCCTCGAAAGAGTCCTGTA | NR_145820.1 |

---

Underlines indicate target sequence and complement sequence. tv: transcript variant, HMGCS2:  
3-hydroxy-3-methylglutaryl-CoA synthase 2
